# Supplementary material
Source: PubMed Central journal article supplement (PMC10026595)
Supplement: NIHMS1878437-supplement-SiteSelective_SI.pdf [file NIHMS1878437-supplement-SiteSelective_SI.pdf]

# Supporting Information

for

## **Site-Selective Tyrosine Phosphorylation in the Activation of the p50 Subunit of NF- $\kappa$ B for DNA Binding and Transcription**

Shengxi Chen,\* Xun Ji, Larisa M. Dedkova, Gal Reddy Potuganti and Sidney M. Hecht\*

Biodesign Center for BioEnergetics, and School of Molecular Sciences, Arizona State University, Tempe, Arizona 85287, United States

Email addresses of corresponding authors: Shengxi Chen, [Shengxi.chen.1@asu.edu](mailto:Shengxi.chen.1@asu.edu); Sidney Hecht, [sid.hecht@asu.edu](mailto:sid.hecht@asu.edu)

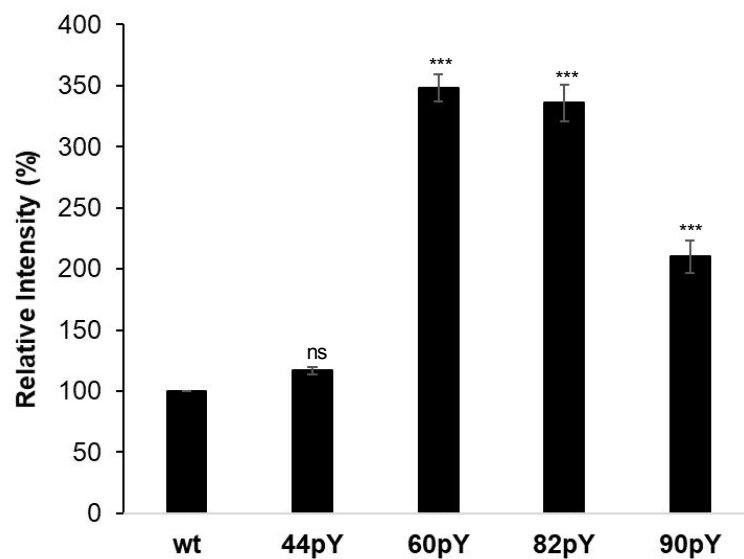

**Figure S1.** Statistical analysis of IL-2 promoter DNA binding of wild-type NF- $\kappa$ B in comparison with each modified NF- $\kappa$ Bs. Statistical significance was calculated using the Student's t-test:  $p < 0.001$  (\*\*\*),  $p > 0.05$  (not significant, ns).

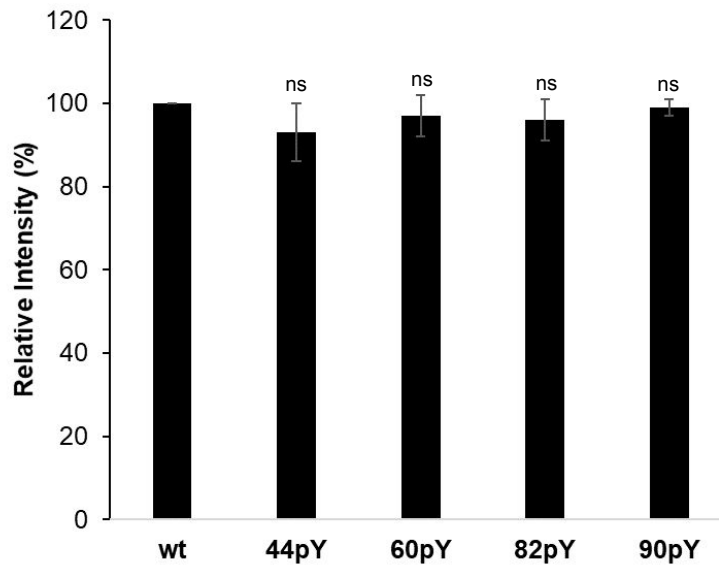

**Figure S2.** Statistical analysis of IL-2 promoter DNA binding of wild-type p50 in comparison with each modified p50. Statistical significance was calculated using the Student's t-test:  $p > 0.05$  (not significant, ns).

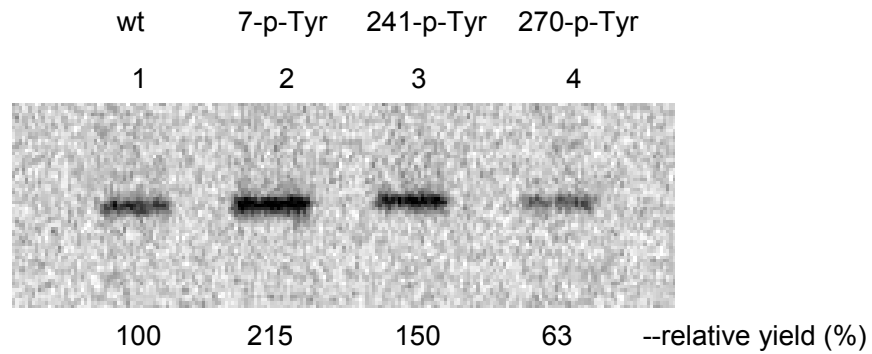

**Figure S3.** Cell free expression of modified p50 subunits of NF- $\kappa$ B containing phosphorylated tyrosine at positions 7, 241 and 270, each synthesized by suppression of nonsense codon UAG in an *E. coli* protein biosynthesizing system using phosphotyrosyl-tRNA<sub>CUA</sub>. Visualization was accomplished using the <sup>35</sup>S-methionine incorporated into the proteins. Following *in vitro* synthesis, each protein was purified on a Strep-tactin column. The purified proteins were analyzed by 15% SDS-PAGE. The isolated yields of the proteins relative to wild type are listed below each lane.

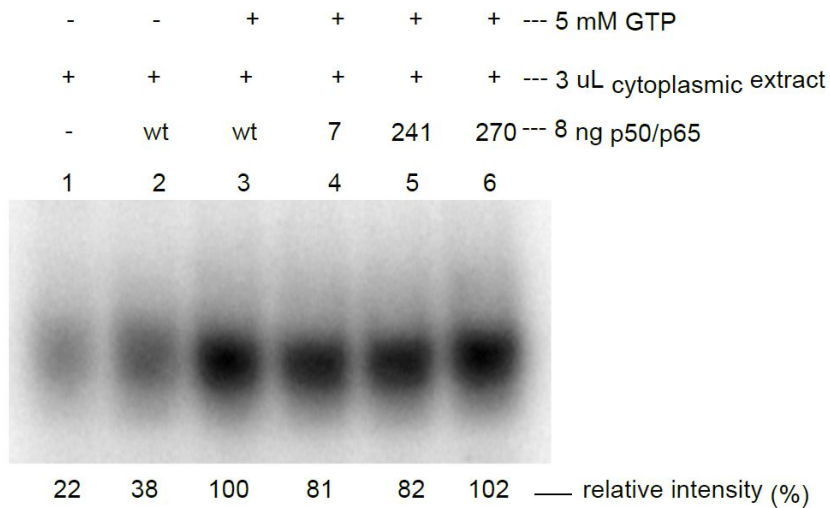

**Figure S4.** DNA binding assay of modified NF- $\kappa$ Bs expressed in a cell free *E. coli* protein biosynthesizing system following treatment with a cytoplasmic lysate from activated Jurkat cells in the presence GTP. The cytoplasmic lysate was incubated at 37 °C for 6 h. The extract was then cooled on ice and combined with cold samples of NF- $\kappa$ B and IL-2 promoter DNA. The incubation was carried out at 4 °C for 10 min. Controls included the cytoplasmic extract alone (lane 1), wild-type NF- $\kappa$ B in the absence and presence of GTP (lanes 2 and 3), and modified NF $\kappa$ Bs containing p50 subunits having pTyr at positions 7, 241 or 270 (lanes 4, 5 and 6, respectively). The analysis of samples was carried out by 5% native PAGE.

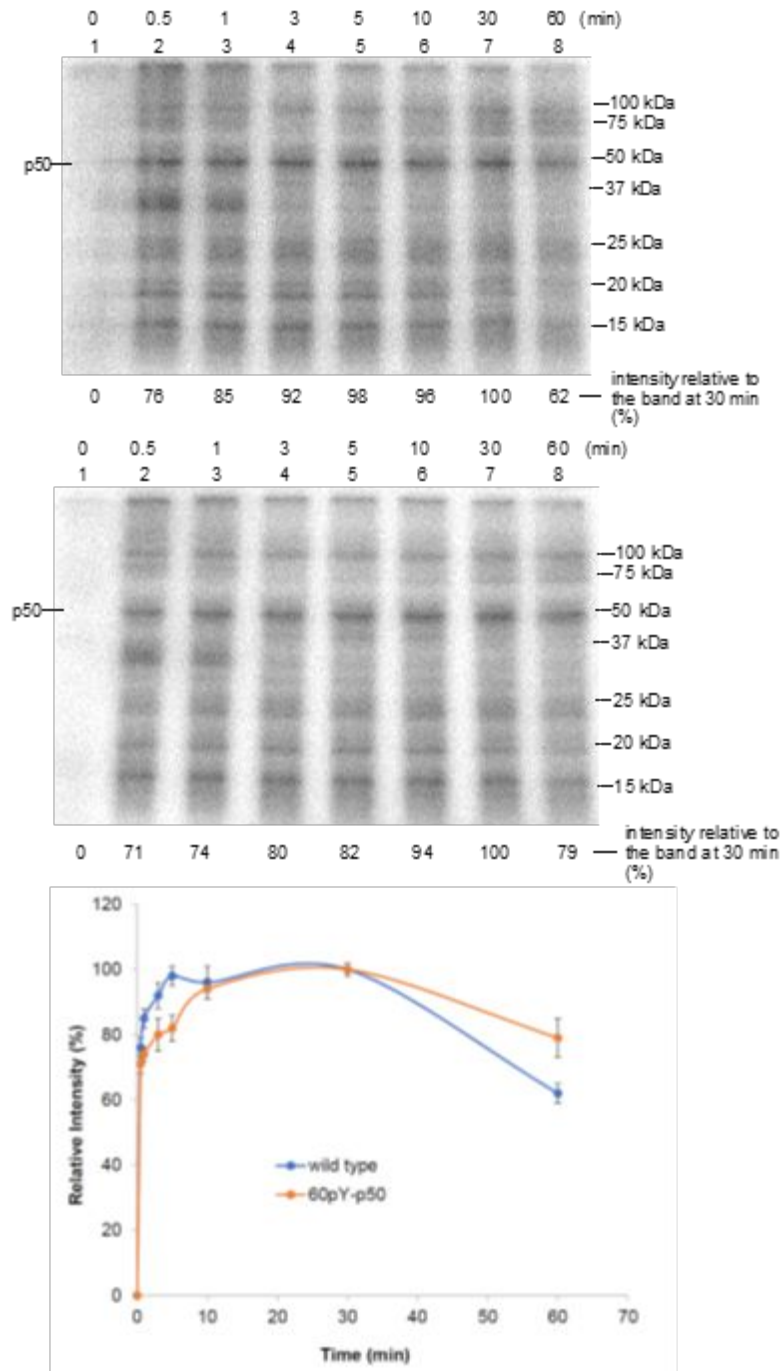

**Figure S5.** Phosphorylation of wild-type p50 (upper panel) and modified p50 (containing pY60) (middle panel) in the presence of Jurkat cell extracts. The *in vitro* expressed p50 proteins (80 ng) were added into the solution containing 15  $\mu$ L of activated Jurkat cell extract in the presence of 80 nM  $\gamma$ - $^{32}$ P-GTP (6000 Ci/mmol). The reaction mixture was incubated at room temperature. The results were analyzed by 15% SDS-PAGE. 0 min: no Jurkat cell extract was added; 0.5 – 60 min after Jurkat cell extract addition. (lower panel) Time course of phosphorylation of the wild-type and modified p50s in the presence of cell extract from activated Jurkat cells. The band at 30 min was defined as 100%.

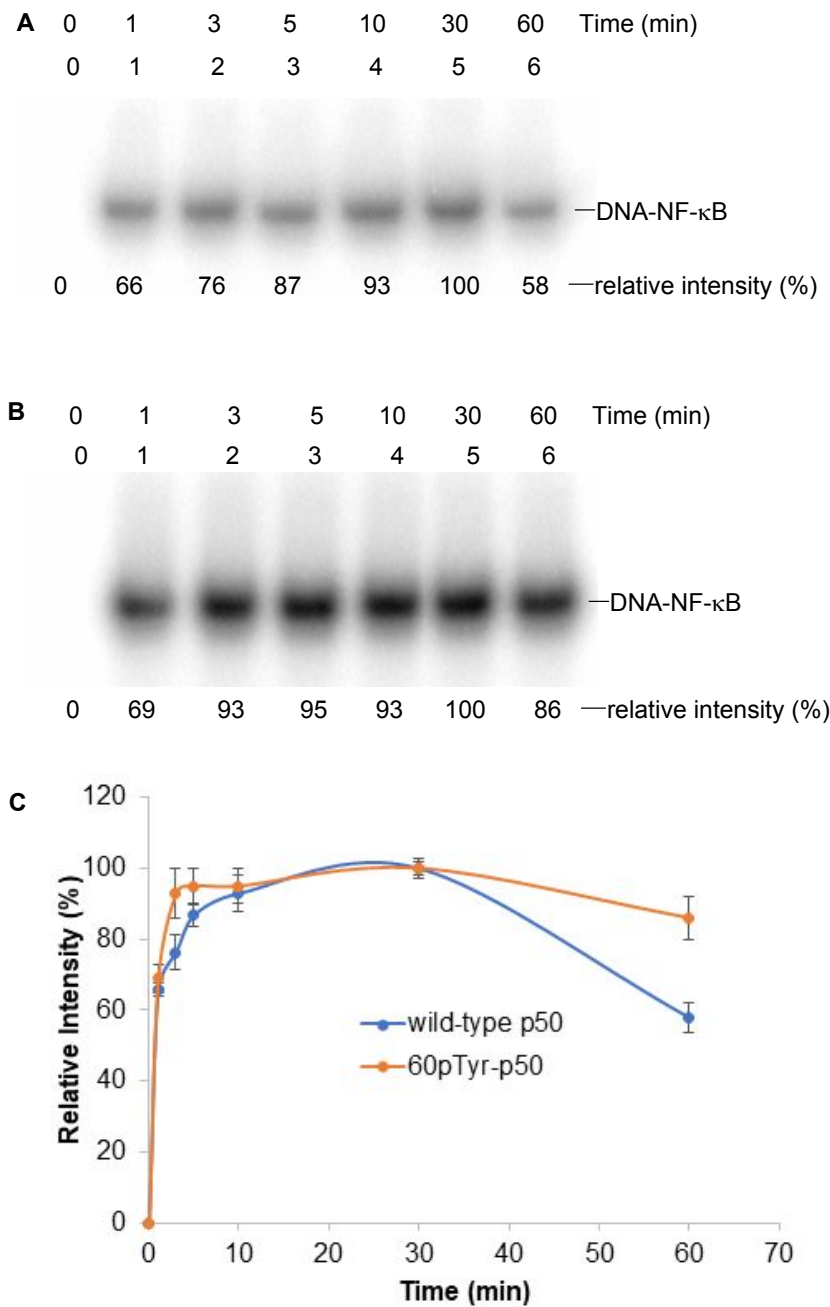

**Figure S6.** Time dependent DNA binding of phosphorylated wild-type p50 (A) and modified p50 (B, p50 containing pY60) in the presence of Jurkat cell extracts. The *in vitro* expressed p50 protein (8 ng) was mixed with 10 ng of wild-type p65 protein and added into (1.5  $\mu$ L) extract from activated Jurkat cells in the presence of 80 nM GTP. The reaction mixture was incubated at room temperature. At the determined time,  $^{32}$ P-labeled DNA (IL-2, 2 pmol) was added to the reaction mixture, which was incubated at room temperature. The results were analyzed using 5% native PAGE. 0 min: no activated Jurkat cell extract was added; 1 – 60 min after Jurkat cell extract addition. (C) Time course of binding of the wild-type and modified p50s to IL-2 promoter DNA in the presence of cell extract from activated Jurkat cells. The band having the highest intensity for each protein was defined as 100.

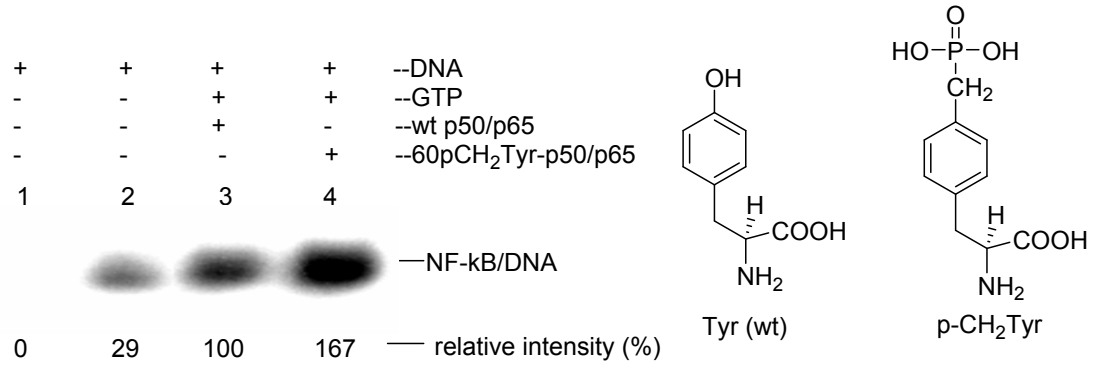

**Figure S7.** The *in vitro* expressed wild-type or modified (60-pCH<sub>2</sub>Tyr) p50 protein (8 ng) was combined with 10 ng of wild-type p65 protein and was preincubated with 1.5  $\mu$ L of lysate from activated Jurkat cells in the presence of 5 mM GTP. <sup>32</sup>P-labeled IL-2 DNA (2 pmol) was added to the reaction mixture, which was incubated at 0 °C for 5 min. The results were analyzed using 5% native PAGE.
